# Supplementary material
Source: publisher figshare collection journal article supplement (https://acs.figshare.com/ndownloader/files/4274310)
Supplement: Supplementary file 1 [file 4274310]

## Supplementary Materials

### Synthesis and characterization of crystalline structures

#### based on phenylboronate ligands bound to alkaline earth cations

M. Reinholdt, J. Croissant, L. Di Carlo, D. Granier, P. Gaveau, S. Bégu, J.-M. Devoisselle, H. Mutin, M. E Smith, C. Bonhomme, C. Gervais, A. van der Lee, and D. Laurencin

#### Supplementary Figures

**Figure S1.** IR and Raman spectra of  $\text{Ca}(\text{PhB}(\text{OH})_3)_2$ ,  $\text{Sr}(\text{PhB}(\text{OH})_3)_2 \cdot \text{H}_2\text{O}$  and  $\text{Ba}(\text{PhB}(\text{OH})_3)_2$ .

**Figure S2.** Rietveld plot for the refinement of the structure of  $\text{Ca}(\text{PhB}(\text{OH})_3)_2$ .

**Figure S3.** Selection of reconstructed diffraction images for  $\text{Sr}(\text{PhB}(\text{OH})_3)_2 \cdot \text{H}_2\text{O}$ .

**Figure S4.** Selection of reconstructed diffraction images for  $\text{Ba}(\text{PhB}(\text{OH})_3)_2$ .

**Figure S5.** Comparison of the SEM, XRD,  $^{11}\text{B}$  NMR and Ca K-edge XANES data of  $\text{Ca}(\text{PhB}(\text{OH})_3)_2$  phases prepared at room temperature or under reflux.

**Figure S6.** Structural representation of  $\text{Ba}(\text{PhB}(\text{OH})_3)_2$ , resulting from preliminary refinement tests.

**Figure S7.** Experimental  $^{11}\text{B}$  MAS NMR spectra of  $\text{Ca}(\text{PhB}(\text{OH})_3)_2$  recorded at 9.4 T and 14.1 T, and their simulation.

**Figure S8.** Experimental (blue) and calculated (red)  $^1\text{H}$ ,  $^{11}\text{B}$  and  $^{13}\text{C}$  NMR spectra of  $\text{Sr}(\text{PhB}(\text{OH})_3)_2 \cdot \text{H}_2\text{O}$  and  $\text{Ba}(\text{PhB}(\text{OH})_3)_2$ .

**Figure S9.** Representation of the inter-chain H bonds in the best DFT model of  $\text{Sr}(\text{PhB}(\text{OH})_3)_2 \cdot \text{H}_2\text{O}$ .

**Figure S10.** 2D  $^1\text{H}$ - $^1\text{H}$  NOESY NMR spectrum of  $\text{Ba}(\text{PhB}(\text{OH})_3)_2$ .

#### Supplementary Tables

**Table S1.** Fractional coordinates of the atoms of  $\text{Ca}(\text{PhB}(\text{OH})_3)_2$  after relaxation of all atomic positions (model M1).

**Table S2 :** Fractional coordinates of the atoms of  $\text{Sr}(\text{PhB}(\text{OH})_3)_2 \cdot \text{H}_2\text{O}$  after relaxation of all atomic positions.

**Table S3.**  $^1\text{H}$ ,  $^{11}\text{B}$ ,  $^{13}\text{C}$  and  $^{43}\text{Ca}$  calculated NMR parameters for the various  $\text{Ca}(\text{PhB}(\text{OH})_3)_2$  models.

**Table S4.**  $^1\text{H}$ ,  $^{11}\text{B}$  and  $^{13}\text{C}$  calculated NMR parameters for the best model of  $\text{Sr}(\text{PhB}(\text{OH})_3)_2 \cdot \text{H}_2\text{O}$ .

**Table S5.** Comparison of the calculated  $^{43}\text{Ca}$  NMR parameters and the average Ca...O bond distance in the models of  $\text{Ca}(\text{PhB}(\text{OH})_3)_2$ .

## Supplementary Materials: Figures

**Figure S1. IR and Raman<sup>1</sup> spectra of  $\text{Ca}(\text{PhB}(\text{OH})_3)_2$ ,  $\text{Sr}(\text{PhB}(\text{OH})_3)_2 \cdot \text{H}_2\text{O}$  and  $\text{Ba}(\text{PhB}(\text{OH})_3)_2$ .**

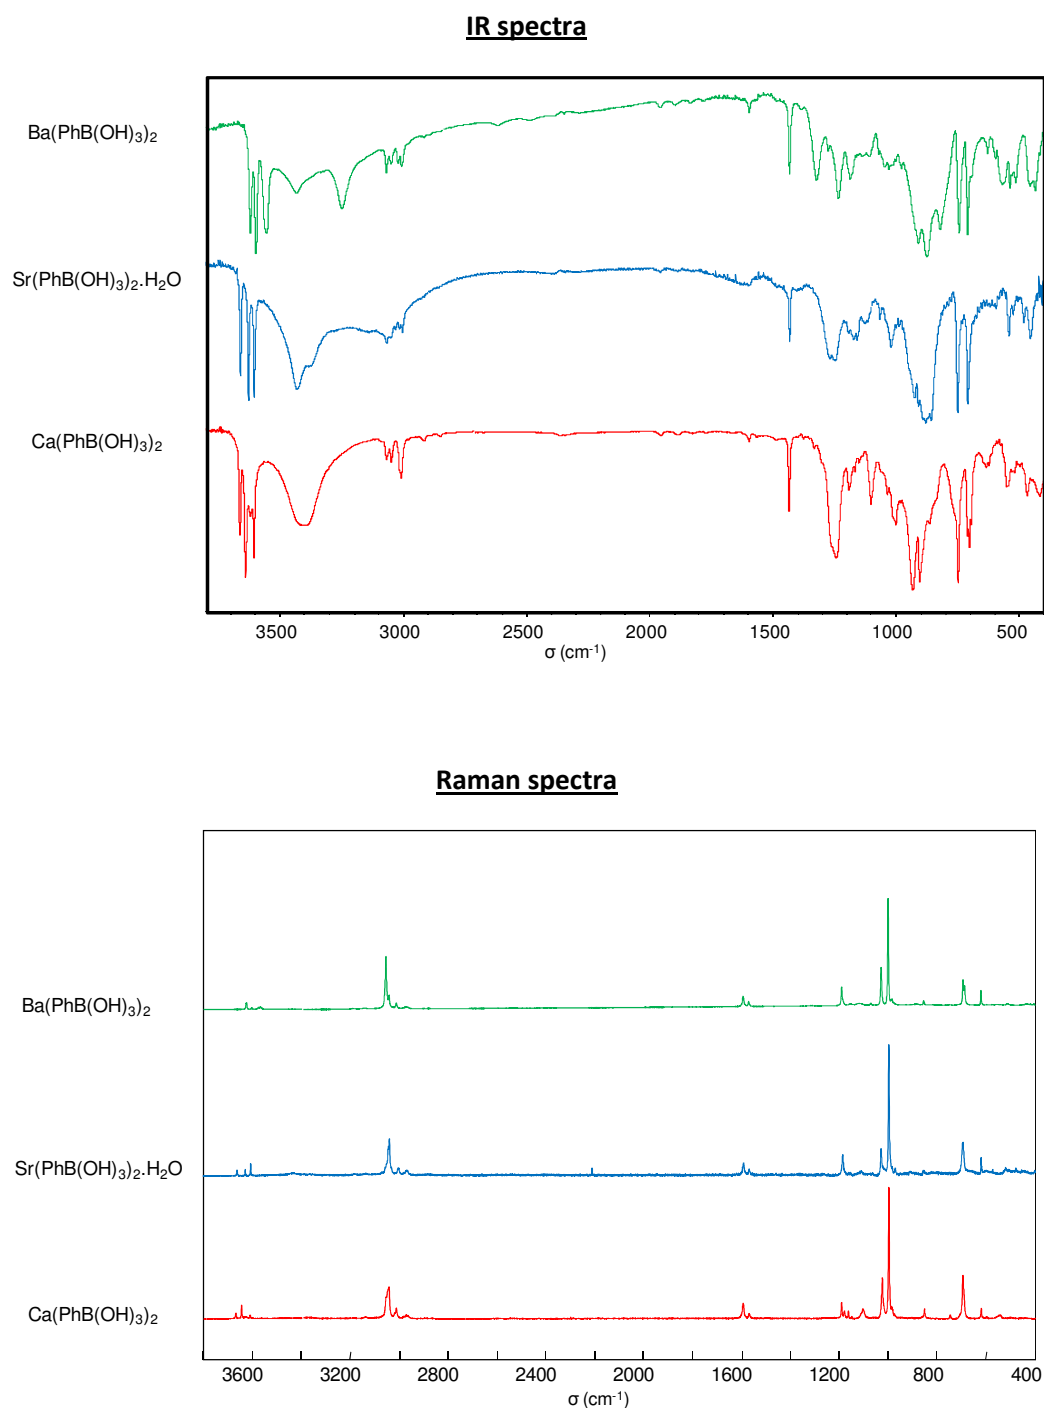

<sup>1</sup> Raman spectroscopy measurements were performed on a LabRAM Aramis IR<sup>2</sup> spectrometer from Horiba Jobin Yvon using a red HeNe laser beam ( $\lambda = 633 \text{ nm}$ ). Spectra were recorded between 50 and  $4000 \text{ cm}^{-1}$  wavenumbers by accumulating 1 to 5 scans during 1 to 60 s per scan depending on the eventual fluorescence of the sample.

**Figure S2. Rietveld plot for the refinement of the structure of  $\text{Ca}(\text{PhB}(\text{OH})_3)_2$ .**

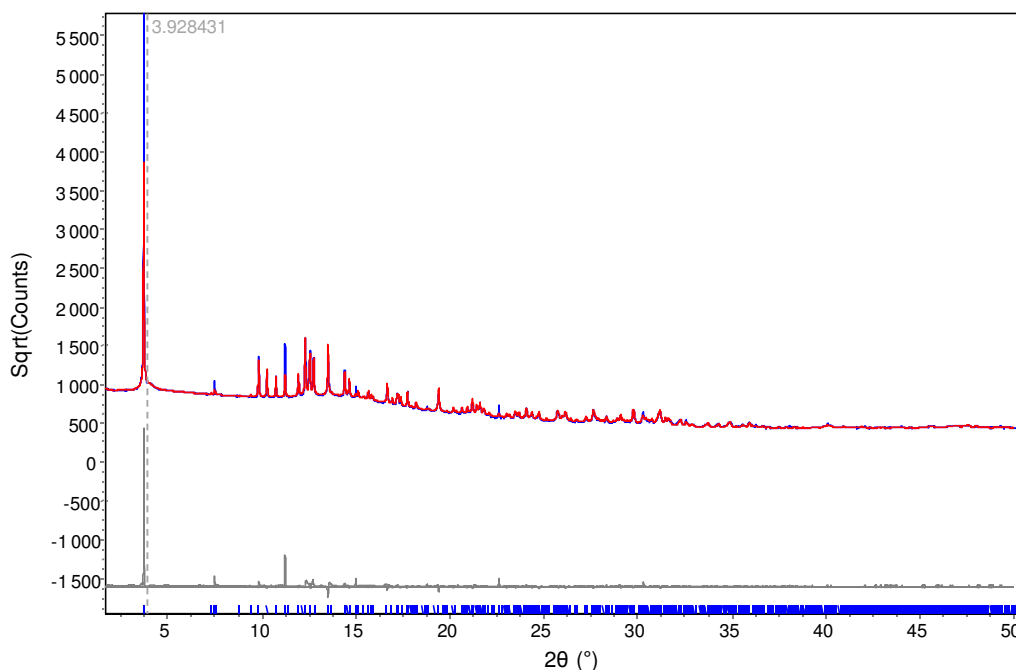

In blue the observed diffractogram, in red the calculated diffractogram and in grey the difference plot. The peak at  $2\theta = 3.928^\circ$  is due to the kapton foil in the beampipe.

Attempts to refine the XRD powder pattern without taking into account the most intense peak at small angles did not lead to better results. Different preferential orientation models were also tested.

Below, a zoom of the higher  $2\theta$  region of the diffractograms and difference plot above is given.

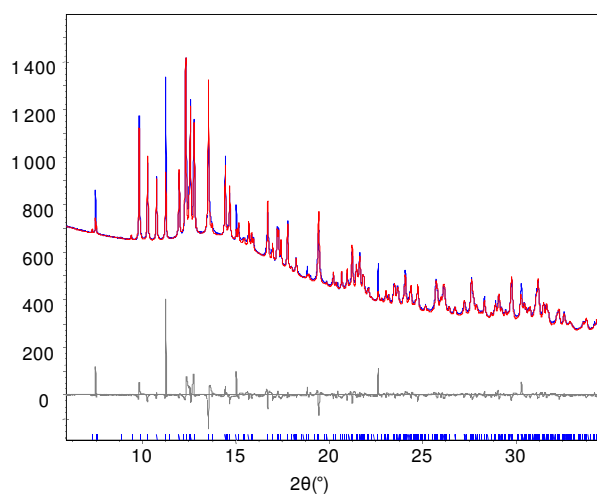

Figure S3. Selection of reconstructed diffraction images for  $\text{Sr}(\text{PhB}(\text{OH})_3)_2 \cdot \text{H}_2\text{O}$ .

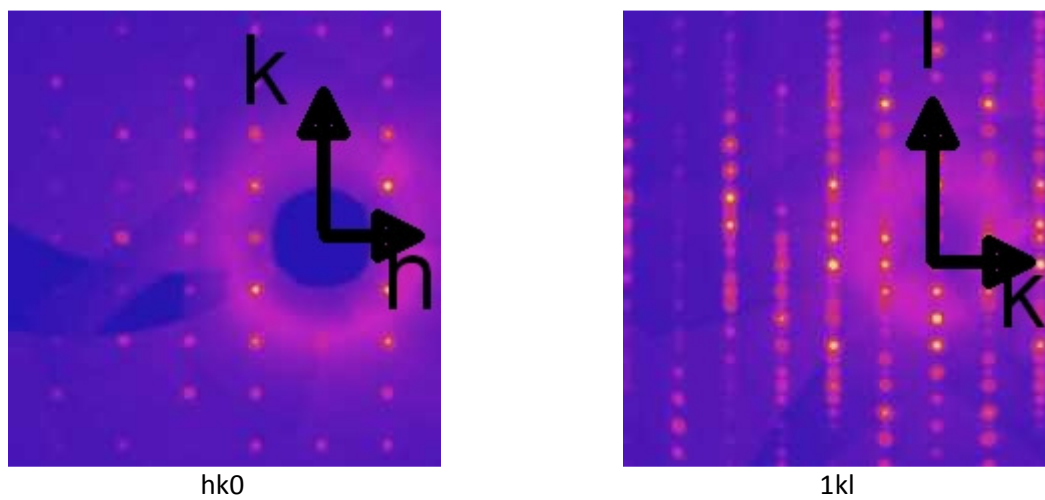

Figure S4. Selection of reconstructed diffraction images for  $\text{Ba}(\text{PhB}(\text{OH})_3)_2$ .

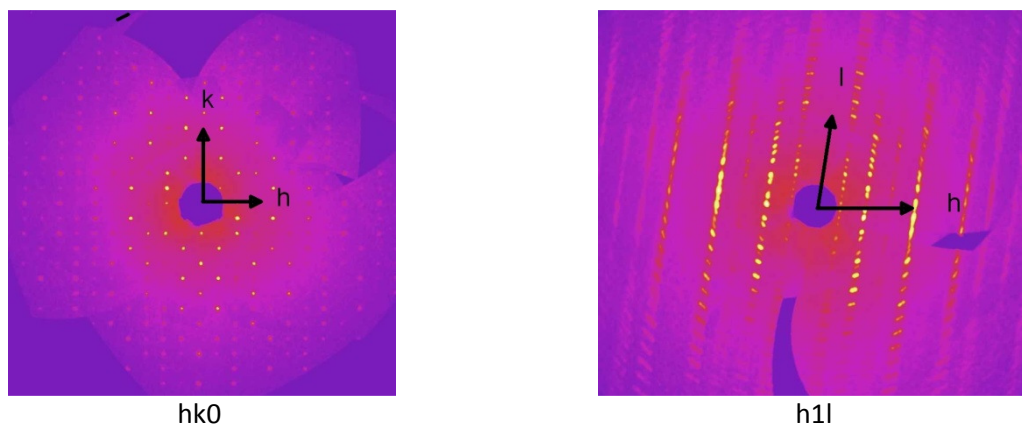

**Figure S5. Comparison of the SEM, XRD,  $^{11}\text{B}$  NMR and Ca K-edge XANES data of  $\text{Ca}(\text{PhB}(\text{OH})_3)_2$  phases prepared at room temperature (R. T.) (in blue) or under reflux (in red).**

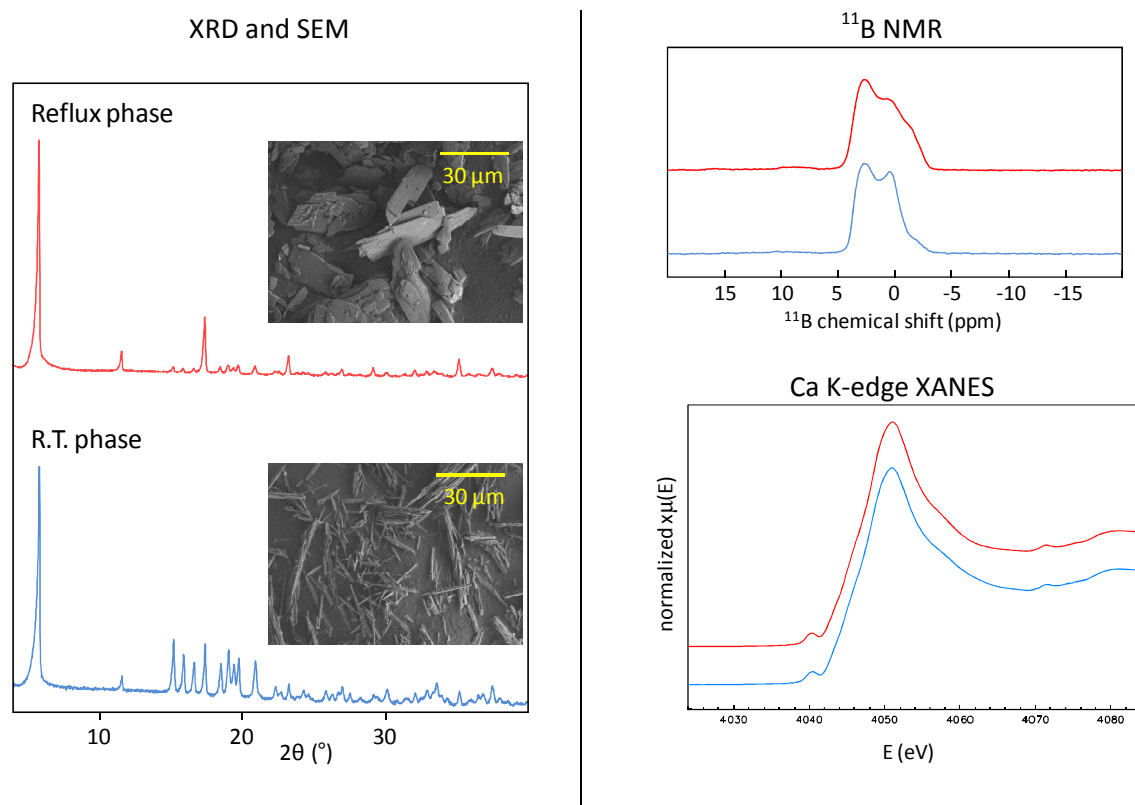

The SEM, XRD and  $^{11}\text{B}$  solid state NMR analyses presented here were carried out in the same conditions as in the experimental section in the main text.

Ca K-edge XANES (X-ray Absorption Near Edge Structure) measurements were performed on the LUCIA beamline<sup>2</sup> at the Soleil Synchrotron (Saint-Aubin, France). The Soleil ring energy was 2.75 GeV and the current was 400 mA. XANES analyses were performed on  $\text{Ca}(\text{PhB}(\text{OH})_3)_2$  samples synthesized at room temperature and under reflux. Both samples were ground to a fine powder, diluted in polyvinyl pyrrolidone (average molecular weight 40,000, Sigma-Aldrich, "PVP40"), pressed into pellets, and run at room temperature in transmission mode. Spectra were collected at the Ca K-edge at 4038 eV. The X-ray incident energy on the sample was defined using a double-crystal Si(111) monochromator. The instrument was evacuated to  $\sim 1$  Pa. An energy resolution of  $\sim 0.5$  eV at the Ca K-edge was achieved and the energy was calibrated with a Ti foil (by setting the maximum of the 1<sup>st</sup> derivative at 4966 eV). The pre-edge (3950–4017 eV), edge (4017.2–4080 eV) and post-edge (4081–4200 eV) regions were scanned in 5.0, 0.2 and 1.0 eV steps respectively, with dwell times per point of 2.0 s. Data reduction was performed using the Athena software package.<sup>3</sup> Typically, three XANES data sets were collected for each sample, which were averaged and normalised with Athena.

<sup>2</sup> Flank, A. M. ; Cauchon, G. ; Lagarde, P. ; Bac, S. ; Janousch, M. ; Wetter, R. ; Dubuisson, J. M. ; Idir, M. ; Langlois, F. ; Moreno, T. ; Vantelon, D. *Nucl Instr and Meth in Phys Rev B* **2006**, 246, 269.

<sup>3</sup> Ravel, B.; Newville, M. *J Synchrotron Radiat* **2005**; 12: 537.

**Figure S6. Structural representation of  $\text{Ba}(\text{PhB}(\text{OH})_3)_2$ , resulting from preliminary refinement tests.**

Ba, B, C, H, and O atoms are represented in green, brown, grey, white and red, respectively. The H atoms of the phenyls were positioned geometrically, whereas those of the OH groups were not positioned.

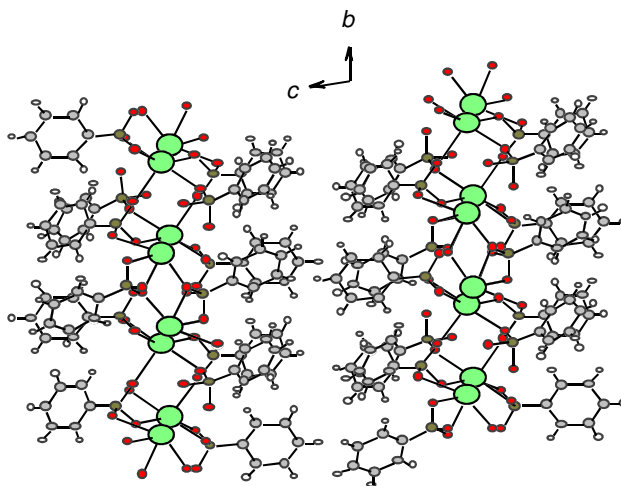

**Figure S7. Experimental  $^{11}\text{B}$  MAS NMR spectra of  $\text{Ca}(\text{PhB}(\text{OH})_3)_2$  recorded at 9.4 T and 14.1 T, and their simulation.**

Experimental  $^{11}\text{B}$  MAS NMR spectra of  $\text{Ca}(\text{PhB}(\text{OH})_3)_2$ , recorded on 400 and 600 MHz NMR spectrometers (in blue), together with their simulation at both magnetic fields considering the presence of 2 boron sites, and using the “best” set of NMR parameters.<sup>4</sup>

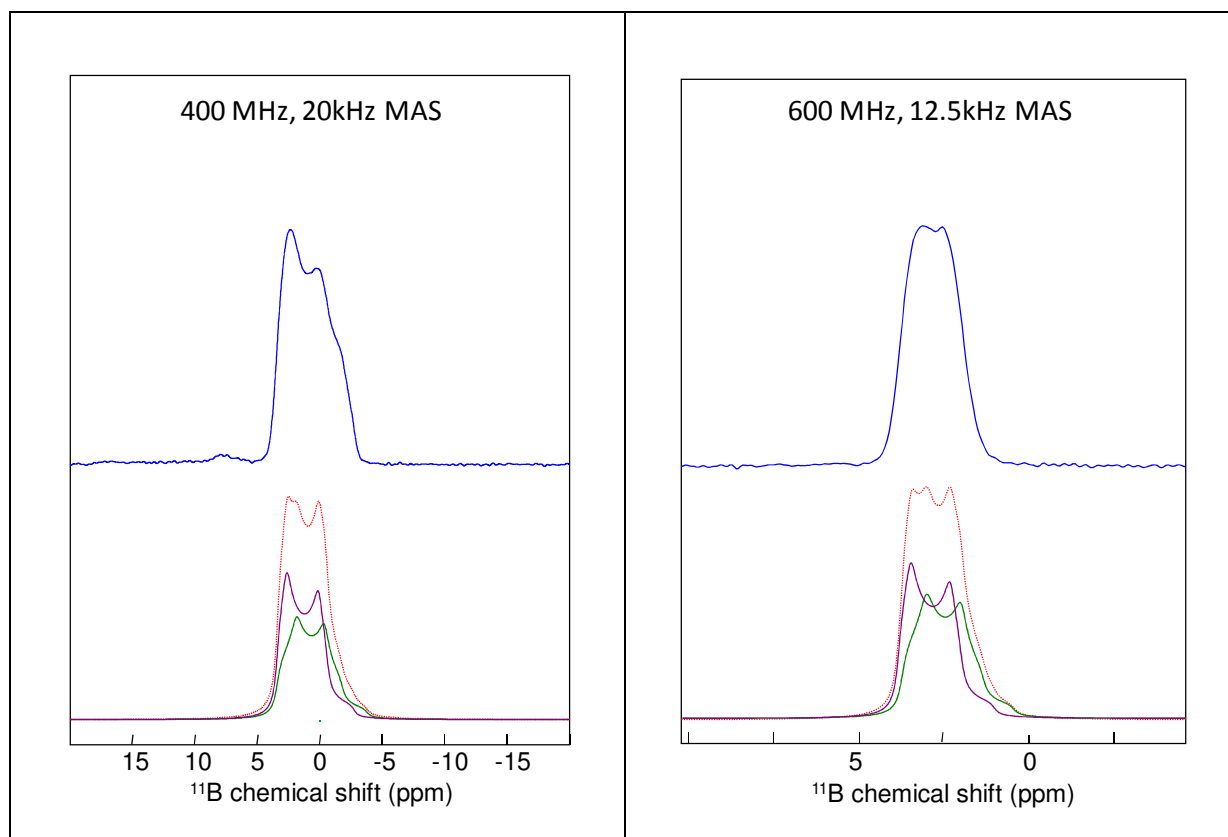

Simulations performed using the following  $^{11}\text{B}$  NMR parameters

Site 1:  $\delta_{\text{iso}} = 3.8 \pm 0.3$  ppm,  $C_Q = 1.4 \pm 0.2$  MHz,  $\eta = 0.4 \pm 0.2$

Site 2:  $\delta_{\text{iso}} = 4.0 \pm 0.2$  ppm,  $C_Q = 1.3 \pm 0.1$  MHz,  $\eta = 0.2 \pm 0.1$

<sup>4</sup> The DMFit software was used for the NMR simulations (Massiot, D. et al. *Magn. Reson. Chem.* **2002** 40,70).

**Figure S8.** Experimental (blue) and calculated (red)  $^1\text{H}$ ,  $^{11}\text{B}$  and  $^{13}\text{C}$  NMR spectra of  $\text{Sr}(\text{PhB}(\text{OH})_3)_2 \cdot \text{H}_2\text{O}$ <sup>5</sup> and  $\text{Ba}(\text{PhB}(\text{OH})_3)_2$ .

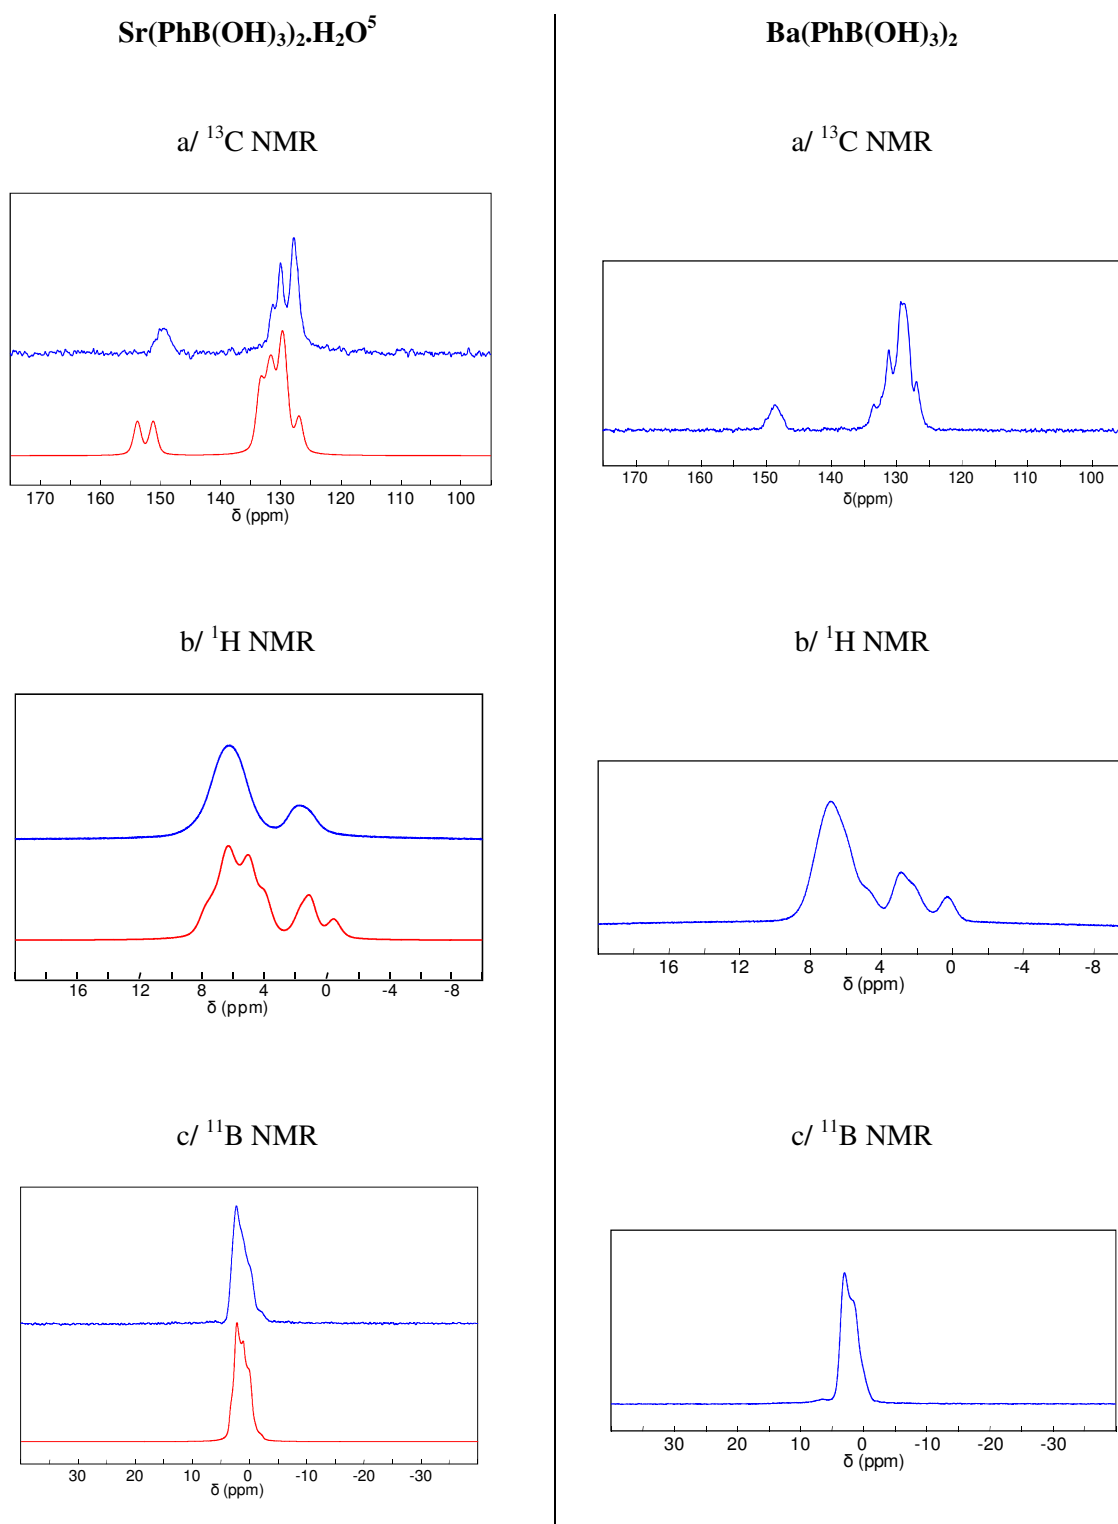

<sup>5</sup> It is noteworthy that for the strontium structure, the discrepancy between experimental and calculated data is stronger than for the calcium one (Figure 5 in main text). This could be due to the higher difficulty in positioning H atoms in the Sr structure and/or to some mobility of the OH groups within this sample (as this can affect the overall aspect of solid state NMR spectra).



**Figure S9. Representation of the inter-chain H bonds in the best DFT model of  $\text{Sr}(\text{PhB}(\text{OH})_3)_2 \cdot \text{H}_2\text{O}$ .**

The strongest H-bonds involve the water ligand. They are represented in dotted blue lines (with the water protons in blue).<sup>6</sup>

The other moderate H bonds mentioned in the main text involve the boronate hydroxyls. They are shown in dashed orange lines (with the corresponding hydroxyl protons in orange).<sup>7</sup>

The aromatic protons have been removed for clarity.

The B, C, Sr, O, and remaining H atoms are in brown, grey, green, red and white, respectively.

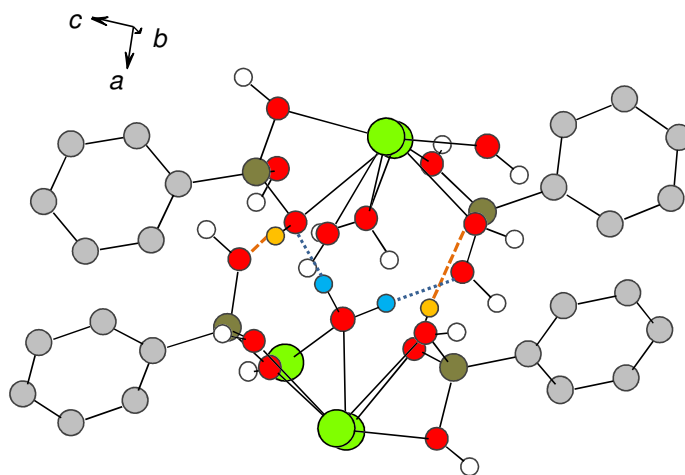

<sup>6</sup> The two strongest H bonds involve the water ligand, as attested from the following geometrical parameters: (O)H...O distances  $\sim 1.75$  Å, O(H)...O distances  $\sim 2.75$  Å, and (OHO) angles  $\sim 174^\circ$ ; they can be considered as “moderate” to “strong” H bonds.

<sup>7</sup> The two more “moderate” H bonds have the following average geometrical characteristics: (O)H...O distances  $\sim 2.0$  Å, O(H)...O distances  $\sim 2.98$  Å, and (OHO) angles  $\sim 170^\circ$ .

Figure S10. 2D  $^1\text{H}$ - $^1\text{H}$  NOESY NMR spectrum of  $\text{Ba}(\text{PhB}(\text{OH})_3)_2$ .

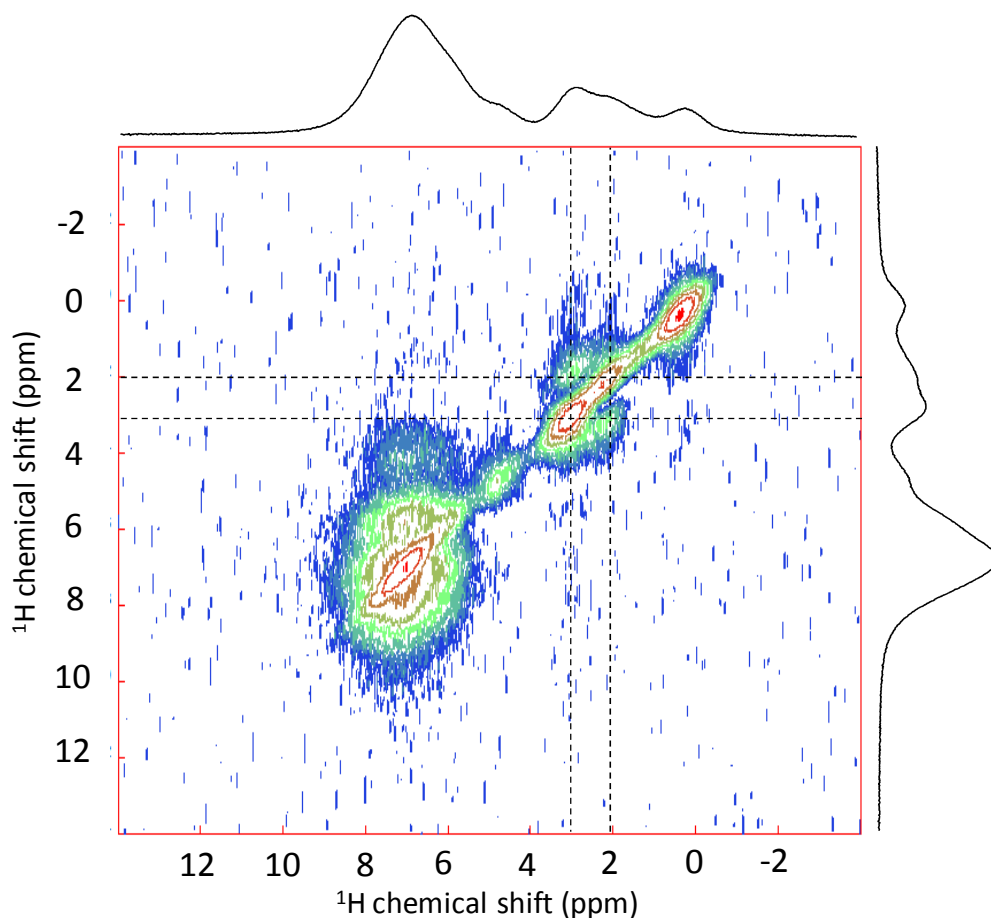

The 2D  $^1\text{H}$ - $^1\text{H}$  NOESY spectrum of  $\text{Ba}(\text{PhB}(\text{OH})_3)_2$  was recorded on a Bruker Avance III 700 MHz (16.45 T) spectrometer at a frequency of 700.13 MHz, using a 1.3 mm Bruker HX MAS probe spinning at 65 kHz. A  $90^\circ$  pulse of  $1.6\ \mu\text{s}$  was used, and recycle delay of 24 s. The mixing time was of 5 ms. For each spectrum, 16 transients were acquired for each of the 200  $t_1$  increments. The total experimental time was 21 hours.

The 1D  $^1\text{H}$  NMR projections shown on the figure above correspond to the  $^1\text{H}$  MAS NMR spectrum of  $\text{Ba}(\text{PhB}(\text{OH})_3)_2$ .

This experiment shows that the protons corresponding to  $^1\text{H}$  NMR signals centered at 3.0 and 2.0 ppm are close to each other within the structure, whereas the others are more distant. Such information could be valuable in the future to propose good models for this structure (i.e. models in which the protons have been properly placed), provided that better X-ray diffraction data were available.

**Supplementary materials : Tables**

**Table S1. Fractional coordinates of the atoms of  $\text{Ca}(\text{PhB}(\text{OH})_3)_2$  after relaxation of all atomic positions (model M1).** The lattice parameters were not relaxed.

|      | x/a     | y/b    | z/c     |
|------|---------|--------|---------|
| B17  | 0.2836  | 0.5501 | 0.1153  |
| B7   | 0.8676  | 0.0524 | 0.1465  |
| C1   | 0.7642  | 0.0870 | 0.3104  |
| C2   | 0.8031  | 0.1518 | 0.3997  |
| C3   | -0.0039 | 0.2580 | 0.4312  |
| C4   | 0.1515  | 0.2977 | 0.3727  |
| C5   | 0.1105  | 0.2316 | 0.2834  |
| C6   | 0.9166  | 0.1251 | 0.2498  |
| C11  | 0.5675  | 0.5545 | 0.2527  |
| C12  | 0.6480  | 0.6109 | 0.3398  |
| C13  | 0.5261  | 0.7295 | 0.3943  |
| C14  | 0.3268  | 0.7905 | 0.3610  |
| C15  | 0.2505  | 0.7343 | 0.2734  |
| C16  | 0.3682  | 0.6139 | 0.2170  |
| Ca1  | 0.9906  | 0.7530 | 0.0007  |
| H11  | 0.6112  | 0.0046 | 0.2888  |
| H21  | 0.6818  | 0.1184 | 0.4443  |
| H31  | 0.0236  | 0.3101 | 0.5006  |
| H41  | 0.3029  | 0.3809 | 0.3957  |
| H51  | 0.2341  | 0.2667 | 0.2397  |
| H111 | 0.6608  | 0.4574 | 0.2123  |
| H121 | 0.8003  | 0.5576 | 0.3647  |
| H131 | 0.5866  | 0.7730 | 0.4623  |
| H141 | 0.2292  | 0.8830 | 0.4024  |
| H151 | 0.09849 | 0.7900 | 0.2495  |
| H81  | 0.7470  | 0.8289 | 0.1798  |
| H101 | 0.6057  | 0.2114 | 0.1150  |
| H191 | 0.4772  | 0.3820 | 0.03402 |
| H201 | 0.5274  | 0.2396 | 0.9127  |
| H181 | 0.0522  | 0.4628 | 0.8466  |
| H91  | 0.7798  | 0.9696 | 0.8634  |
| O8   | 0.7394  | 0.8789 | 0.1277  |
| O9   | 0.0857  | 0.0281 | 0.0974  |
| O10  | 0.7498  | 0.1662 | 0.0963  |
| O18  | 0.0236  | 0.5346 | 0.0998  |
| O19  | 0.3597  | 0.3771 | 0.0762  |
| O20  | 0.3524  | 0.6744 | 0.0596  |

**Table S2 : Fractional coordinates of the atoms of  $\text{Sr}(\text{PhB}(\text{OH})_3)_2 \cdot \text{H}_2\text{O}$  after relaxation of all atomic positions.** The lattice parameters were not relaxed.<sup>8</sup>

|      | x/a    | y/b    | z/c    |
|------|--------|--------|--------|
| B3   | 0.2149 | 0.7122 | 0.1829 |
| B14  | 0.2273 | 0.7220 | 0.3399 |
| C10  | 0.1623 | 0.5841 | 0.0600 |
| C11  | 0.2391 | 0.6036 | 0.1030 |
| C17  | 0.3549 | 0.6916 | 0.3866 |
| C18  | 0.5513 | 0.6038 | 0.3892 |
| C19  | 0.6698 | 0.5781 | 0.4283 |
| C20  | 0.5921 | 0.6421 | 0.4666 |
| C21  | 0.3967 | 0.7280 | 0.4655 |
| C22  | 0.2799 | 0.7528 | 0.4260 |
| C6   | 0.1258 | 0.6992 | 0.1328 |
| C7   | 0.9290 | 0.7686 | 0.1178 |
| C8   | 0.8485 | 0.7512 | 0.5749 |
| C9   | 0.9673 | 0.8428 | 0.5457 |
| H101 | 0.2557 | 0.5101 | 0.0379 |
| H111 | 0.3876 | 0.5388 | 0.1132 |
| H121 | 0.1295 | 0.8233 | 0.4263 |
| H121 | 0.1095 | 0.2457 | 0.2608 |
| H122 | 0.1422 | 0.1899 | 0.2127 |
| H131 | 0.2052 | 0.9778 | 0.3537 |
| H151 | 0.6073 | 0.4642 | 0.6868 |
| H161 | 0.9273 | 0.6686 | 0.3628 |
| H181 | 0.6148 | 0.5515 | 0.3597 |
| H191 | 0.8182 | 0.5053 | 0.4290 |
| H201 | 0.6818 | 0.6206 | 0.4972 |
| H21  | 0.9475 | 0.4347 | 0.3062 |
| H211 | 0.3342 | 0.7742 | 0.4956 |
| H41  | 0.0729 | 0.4863 | 0.1960 |
| H51  | 0.4750 | 0.2432 | 0.3385 |
| H71  | 0.8372 | 0.8444 | 0.1397 |
| H81  | 0.6964 | 0.8078 | 0.0647 |
| H91  | 0.9087 | 0.6433 | 0.0121 |
| O2   | 0.0972 | 0.8341 | 0.2103 |
| O4   | 0.2078 | 0.5447 | 0.2037 |
| O5   | 0.4494 | 0.7661 | 0.1877 |
| O12  | 0.2215 | 0.2009 | 0.2415 |
| O13  | 0.2172 | 0.9074 | 0.3282 |
| O15  | 0.3440 | 0.6459 | 0.3032 |
| O16  | 0.0052 | 0.6505 | 0.3365 |
| Sr1  | 0.4513 | 0.9269 | 0.2636 |

<sup>8</sup> It should be noted that in this model, some of the heavier atoms (including oxygen) have moved slightly compared to the experimental X-ray data, following the full-atomic position relaxation.

**Table S3.**  $^1\text{H}$ ,  $^{11}\text{B}$ ,  $^{13}\text{C}$  and  $^{43}\text{Ca}$  calculated NMR parameters for the various DFT models of  $\text{Ca}(\text{PhB}(\text{OH})_3)_2$ .

|      | M1                             |                |        | M2                             |                |        | M3                             |                |        | M4                             |                |        |
|------|--------------------------------|----------------|--------|--------------------------------|----------------|--------|--------------------------------|----------------|--------|--------------------------------|----------------|--------|
|      | $\delta_{\text{iso}}$<br>(ppm) | $C_Q$<br>(MHz) | $\eta$ |
| Ca1  | 26.1                           | -1.40          | 0.49   | 10.4                           | 2.00           | 0.57   | 33.5                           | 0.66           | 0.99   | 31.2                           | -1.34          | 0.69   |
| B7   | 3.8                            | -1.39          | 0.36   | 3.2                            | -1.30          | 0.59   | 4.1                            | -1.60          | 0.15   | 4.0                            | -1.44          | 0.37   |
| B17  | 4.0                            | -1.34          | 0.19   | 4.9                            | -1.37          | 0.30   | 4.6                            | -1.46          | 0.12   | 4.1                            | -1.35          | 0.20   |
| C1   | 132.7                          |                |        | 132.3                          |                |        | 133.7                          |                |        | 133.2                          |                |        |
| C2   | 132.4                          |                |        | 133.5                          |                |        | 132.8                          |                |        | 132.5                          |                |        |
| C3   | 129.2                          |                |        | 124.3                          |                |        | 129.7                          |                |        | 129.3                          |                |        |
| C4   | 131.8                          |                |        | 125.7                          |                |        | 131.3                          |                |        | 131.7                          |                |        |
| C5   | 132.8                          |                |        | 128.5                          |                |        | 132.9                          |                |        | 132.3                          |                |        |
| C6   | 150.8                          |                |        | 148.1                          |                |        | 146.4                          |                |        | 150.2                          |                |        |
| C11  | 132.0                          |                |        | 131.4                          |                |        | 131.8                          |                |        | 132.0                          |                |        |
| C12  | 133.0                          |                |        | 135.3                          |                |        | 132.8                          |                |        | 133.3                          |                |        |
| C13  | 130.9                          |                |        | 125.8                          |                |        | 131.1                          |                |        | 131.0                          |                |        |
| C14  | 132.2                          |                |        | 127.0                          |                |        | 132.3                          |                |        | 132.2                          |                |        |
| C15  | 135.6                          |                |        | 130.9                          |                |        | 135.6                          |                |        | 136.0                          |                |        |
| C16  | 153.2                          |                |        | 153.2                          |                |        | 149.6                          |                |        | 152.8                          |                |        |
| H11  | 4.5                            |                |        | 4.4                            |                |        | 4.7                            |                |        | 4.4                            |                |        |
| H21  | 6.2                            |                |        | 6.2                            |                |        | 6.3                            |                |        | 6.2                            |                |        |
| H31  | 6.2                            |                |        | 6.2                            |                |        | 6.4                            |                |        | 6.2                            |                |        |
| H41  | 4.9                            |                |        | 4.4                            |                |        | 4.9                            |                |        | 4.8                            |                |        |
| H51  | 5.8                            |                |        | 5.5                            |                |        | 5.7                            |                |        | 5.8                            |                |        |
| H111 | 6.2                            |                |        | 6.0                            |                |        | 6.0                            |                |        | 6.1                            |                |        |
| H121 | 4.9                            |                |        | 5.3                            |                |        | 4.9                            |                |        | 5.0                            |                |        |
| H131 | 6.7                            |                |        | 6.6                            |                |        | 6.7                            |                |        | 6.7                            |                |        |
| H141 | 5.5                            |                |        | 5.1                            |                |        | 5.7                            |                |        | 5.4                            |                |        |
| H151 | 5.5                            |                |        | 5.5                            |                |        | 5.4                            |                |        | 5.5                            |                |        |
| H81  | 0.2                            |                |        | 0.0                            |                |        | -0.4                           |                |        | 0.2                            |                |        |
| H101 | 3.1                            |                |        | 3.1                            |                |        | 4.7                            |                |        | 3.0                            |                |        |
| H191 | 5.6                            |                |        | 6.1                            |                |        | 4.2                            |                |        | 5.1                            |                |        |
| H201 | 5.8                            |                |        | 6.7                            |                |        | 5.1                            |                |        | 6.1                            |                |        |
| H181 | 1.4                            |                |        | 2.0                            |                |        | 2.0                            |                |        | 1.3                            |                |        |
| H91  | 1.4                            |                |        | 1.6                            |                |        | 1.8                            |                |        | 1.5                            |                |        |

**Table S4.**  $^1\text{H}$ ,  $^{11}\text{B}$  and  $^{13}\text{C}$  calculated NMR parameters for the best DFT model of  $\text{Sr}(\text{PhB}(\text{OH})_3)_2 \cdot \text{H}_2\text{O}$ .

|      | $\delta_{\text{iso}}$<br>(ppm) | $C_Q$<br>(MHz) | $\eta$ |
|------|--------------------------------|----------------|--------|
| B3   | 3.8                            | -1.12          | 0.43   |
| B14  | 3.2                            | -1.21          | 0.15   |
| C10  | 133.6                          |                |        |
| C11  | 133.3                          |                |        |
| C17  | 151.3                          |                |        |
| C18  | 129.8                          |                |        |
| C19  | 127.0                          |                |        |
| C20  | 132.2                          |                |        |
| C21  | 131.3                          |                |        |
| C22  | 131.7                          |                |        |
| C6   | 153.9                          |                |        |
| C7   | 130.1                          |                |        |
| C8   | 129.2                          |                |        |
| C9   | 129.6                          |                |        |
| H101 | 6.1                            |                |        |
| H111 | 5.2                            |                |        |
| H121 | 7.8                            |                |        |
| H122 | 7.3                            |                |        |
| H131 | -0.5                           |                |        |
| H151 | 1.7                            |                |        |
| H161 | 1.1                            |                |        |
| H181 | 6.4                            |                |        |
| H191 | 4.1                            |                |        |
| H201 | 5.7                            |                |        |
| H21  | 5.0                            |                |        |
| H211 | 6.5                            |                |        |
| H221 | 5.0                            |                |        |
| H41  | 3.9                            |                |        |
| H51  | 1.1                            |                |        |
| H71  | 6.2                            |                |        |
| H81  | 4.8                            |                |        |
| H91  | 6.7                            |                |        |

**Table S5. Comparison of the calculated  $^{43}\text{Ca}$  NMR parameters and the average Ca...O bond distance in the models of  $\text{Ca}(\text{PhB}(\text{OH})_3)_2$ .**

| Model | Average d(Ca...O) (in Å) | Calculated $\delta_{\text{iso}}$ (in ppm) |
|-------|--------------------------|-------------------------------------------|
| M1    | 2.49                     | 26.1                                      |
| M2    | 2.55                     | 10.4                                      |
| M3    | 2.47                     | 33.5                                      |
| M4    | 2.48                     | 31.2                                      |
